# Supplementary material for: Epigenetic Regulation of Gfi1 in Endocrine-Related Cancers: A Role Regulating Tumor Growth
Source: MDPI journal article supplement (doi:10.3390/ijms21134687), 2020-06-30
Supplement: s1 [file s1]

## **Supplementary information**

### **Supplementary methods**

#### **Migration and invasion Assays**

Migration assays were performed in transwell insert with 8  $\mu\text{m}$  pore uncoated membrane filters (Corning Incorporated). Transwell were covered with 0.1  $\mu\text{g}/\mu\text{L}$  of fibronectin (Sigma-Aldrich). Transfected cells were trypsinized, resuspended in serum-free DMEN or RPMI and transferred to the upper chamber. 600  $\mu\text{l}$  of growth medium containing 10% FBS was added to the bottom wells. The cells were cultured at 37°C and 5%  $\text{CO}_2$  for 24 hours. Following incubation, the medium was aspirated, and the cells remaining on the upper surface of the filter were stained with crystal violet for 1 hour. The average number of migrated cell were determined by counting the cells in 3 random high power field (10x).

Invasion assays were performed in matrigel chambers (BD). Matrigels invasion chambers were rehydrated with serum-free DMEN or RPMI at 37°C and 5%  $\text{CO}_2$  for 1 hour. Transfected cells were trypsinized, resuspended in serum-free DMEN or RPMI and transferred to the upper chamber. 600  $\mu\text{l}$  of growth medium containing 10% FBS was added to the bottom wells. The cell were cultured at 37°C and 5%  $\text{CO}_2$  for 24 hours. Following incubation, the medium were aspirated, and the cells remaining on the upper surface of the filter were stained with crystal violet for 1 hour. The average number of migrated cell were determined by counting the cells in 3 random high power field (10x).

## Supplementary Figure 1

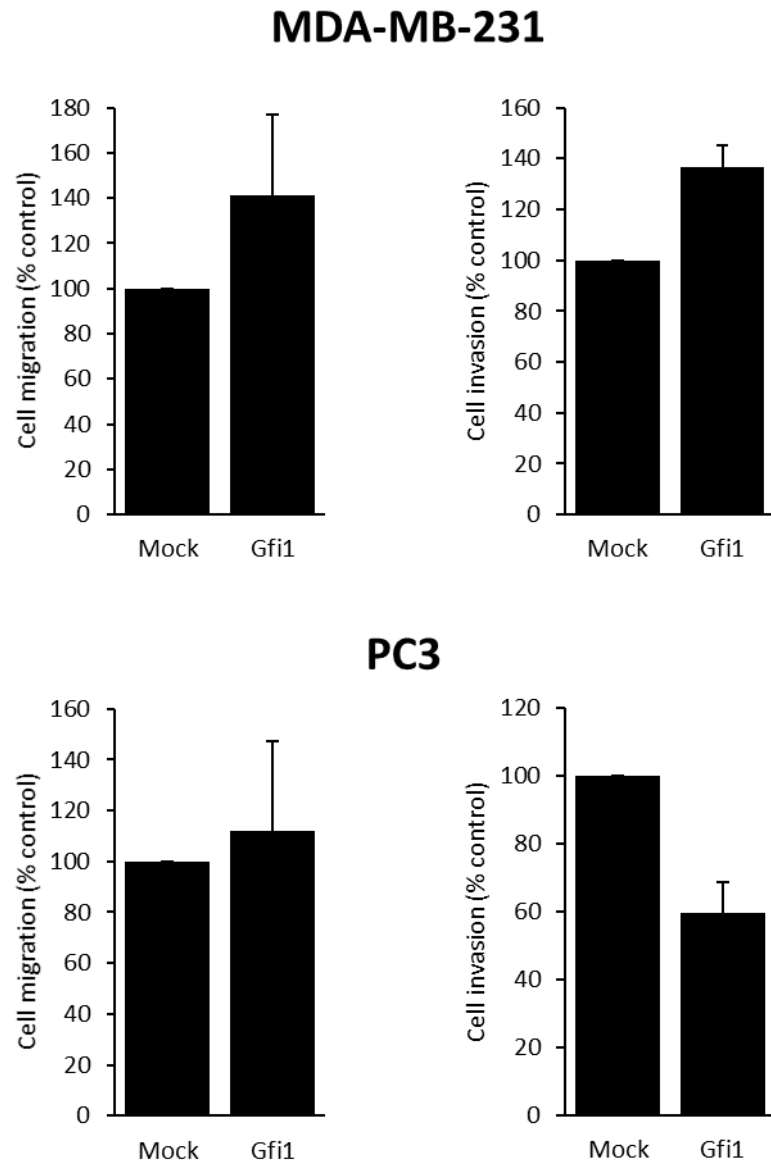

**Supplementary figure 1.** Cellular migration and invasion of empty vector and Gfi1-transfected MDA-MB-231 and PC3 cells. Cells that migrated through the insert were counted after staining with crystal violet.
